# Supplementary material for: Acute Glycemic Control in Prediabetes Individuals Favorably Alters Serum NLRP3 Inflammasome and Related Interleukins
Source: MDPI journal article supplement (doi:10.3390/ijms241813837), 2023-09-08
Supplement: s1 [file s1]

Table S1. Baseline general characteristics and circulating levels of NLRP3 inflammasome and related interleukins of the PD participants.

| Parameters                 |                 |
|----------------------------|-----------------|
| N (M/F)                    | 67 (20/47)      |
| Age (year)                 | 41.9 ± 8.0      |
| Weight (kg)                | 82.6 ± 14.2     |
| BMI (kg/m <sup>2</sup> )   | 33.2 ± 5.5      |
| Waist (cm)                 | 95.4 ± 11.9     |
| Hips (cm)                  | 111.0 ± 9.6     |
| Waist Hip Ratio            | 0.86 ± 0.08     |
| Systolic BP (mmHg)         | 122 ± 14.5      |
| Diastolic BP (mmHg)        | 77.0 ± 10.9     |
| Fasting Glucose (mmol/L)   | 5.95 ± 0.30     |
| Insulin (uU/mL)            | 16.48 ± 5.03    |
| HbA1c (%)                  | 5.61 ± 0.44     |
| Total Cholesterol (mmol/L) | 4.82 ± 0.95     |
| HDL Cholesterol (mmol/L)   | 1.07 ± 0.30     |
| Triglycerides (mmol/L)     | 1.49 (1.0-2.2)  |
| IL-1 $\alpha$ (pg/ml)      | 0.67 (0.5-1.2)  |
| IL-1 $\beta$ (pg/ml)       | 0.82 (0.6-2.2)  |
| IL-18 (pg/ml)              | 18.49 (4-51.5)  |
| IL-33 (pg/ml)              | 3.24 (2.9-3.9)  |
| IL-37 (pg/ml)              | 2.98 (2.1-8.5)  |
| Caspase-1 (ng/ml)          | 0.72 (0.4-2.2)  |
| NLRP3 (ng/ml)              | 0.12 (0.09-0.2) |

Note: Data presented Mean ± S.D and Median (25<sup>th</sup>-75<sup>th</sup>) percentile for normal and non-normal parameters.
